# Supplementary material
Source: MDPI journal article supplement (https://www.mdpi.com/2313-433X/10/5/119)
Supplement: s1 [file s1]

**Table S1.** The full search string of each database.

| Source         | Search terms                                                                                                                                                                                                                                                                                                                                                                                                                                                                                                                                                                                                                                                               |
|----------------|----------------------------------------------------------------------------------------------------------------------------------------------------------------------------------------------------------------------------------------------------------------------------------------------------------------------------------------------------------------------------------------------------------------------------------------------------------------------------------------------------------------------------------------------------------------------------------------------------------------------------------------------------------------------------|
| PubMed         | <p><i>Concept 1: soft tissue</i></p> <p>Soft-tissue*[tiab] OR "face profile"[tiab] OR "facial profile"[tiab] OR profile-change*[tiab]</p> <p><i>Concept 2: orthognathic surgery</i></p> <p>"Orthognathic Surgery"[Mesh] OR orthognathic-surg*[tiab] OR jaw-surg*[tiab] OR "Orthognathic surgical procedures"[Mesh] OR maxillomandibular*[tiab] OR bimaxillary-surg*[tiab] OR "Mandibular advancement"[Mesh] OR mandibular-advance*[tiab] OR "mandibular setback"[tiab] OR "Osteotomy, Le Fort"[Mesh] OR Le-Fort*[tiab] OR LeFort*[tiab] OR "Osteotomy, sagittal split ramus"[Mesh] OR sagittal-split*[tiab] OR BSSO[tiab] OR SSRO[tiab] OR IVRO[tiab]</p>                  |
|                | <p><i>Concept 1: soft tissue</i></p> <p>'soft tissue'/exp OR 'soft tissue':ti,ab,kw OR 'face profile'/exp OR 'facial profile':ti,ab,kw OR 'profile change':ti,ab,kw</p> <p><i>Concept 2: orthognathic surgery</i></p> <p>'orthognathic surgery'/exp OR 'orthognathic surg':ti,ab,kw OR 'bimaxillary surg':ti,ab,kw OR 'maxillo-mandibular':ti,ab,kw OR 'jaw surg':ti,ab,kw OR 'Maxillomandibular':ti,ab,kw OR 'mandibular osteotomy'/exp OR 'mandibular advance':ti,ab,kw OR 'mandibular setback':ti,ab,kw OR 'sagittal split':ti,ab,kw OR 'BSSO':ti,ab,kw OR 'SSRO':ti,ab,kw OR 'IVRO':ti,ab,kw OR 'Maxilla osteotomy'/exp OR 'Le Fort':ti,ab,kw OR 'LeFort':ti,ab,kw</p> |
| Web of science | <p><i>Concept 1: soft tissue</i></p> <p>"Soft tissue*" OR "face profile" OR "facial profile" OR "profile change"</p> <p><i>Concept 2: orthognathic surgery</i></p> <p>"Orthognathic Surg*" OR "jaw surg*" OR maxillomandibular* OR "bimaxillary surg*" OR "mandibular advance*" OR "mandibular setback" OR "Le Fort*" OR LeFort* OR "sagittal split*" OR BSSO OR SSRO OR IVRO</p>                                                                                                                                                                                                                                                                                          |
| Cochrane       | <p><i>Concept 1: soft tissue</i></p> <p>((Soft NEXT tissue*) OR face profile OR facial profile OR (profile NEXT change*)):ti,ab,kw</p> <p><i>Concept 2: orthognathic surgery</i></p> <p>([mh "Orthognathic Surgery"] OR [mh "orthognathic surgical procedures"] OR [mh "mandibular advancement"] OR [mh "osteotomy, Le Fort"] OR [mh "Osteotomy, sagittal split ramus"]) OR (orthognathic NEXT surg*) OR (jaw NEXT surg*) OR maxillomandibular* OR (bimaxillary NEXT surg*) OR (mandibular NEXT advance*) OR mandibular setback OR (Le NEXT Fort*) OR LeFort* OR (sagittal NEXT split*) OR BSSO OR SSRO OR IVRO):ti,ab,kw</p>                                              |

**Table S2.** Methodological data of the studies included in the review.

| Year, first author | Study design | Sample size | Mean age (years)   | Gender      | Diagnosis       | CBCT/ MSCT <sup>a</sup> | 3D photo <sup>a</sup> | Software package and/or algorithm                | Type of surgery                           | Results <sup>b</sup>                                                                                                                                                                                             |
|--------------------|--------------|-------------|--------------------|-------------|-----------------|-------------------------|-----------------------|--------------------------------------------------|-------------------------------------------|------------------------------------------------------------------------------------------------------------------------------------------------------------------------------------------------------------------|
| 2004, Chabanas     | NR           | 3           | NR                 | NR          | NR              | MSCT**                  | No                    | FEM                                              | NR                                        | ME range 1 - 1.5 mm, MaxE 3–6 mm                                                                                                                                                                                 |
| 2007, Mollemans    | RS           | 10          | NR                 | NR          | C II, C III     | MSCT**                  | Yes                   | (1)linear FEM; (2)non-linear FEM; (3)MSM; (4)MTM | TRIMAX, BIMAX, BSSO, BSSO+Ch, LFI+Ch      | The average median distance for MTM: 0.60 mm, FEM: 0.60 mm, MSM: 0.64 mm, NFEM: 0.63 mm, average 90th percentile distance for MTM: 1.48mm, FEM: 1.51mm, MSM: 1.67mm, NFEM: 1.71mm; Highest accuracy: FEM and MTM |
| 2007, Marchetti    | NR           | 25          | 25.1 <sup>^^</sup> | F: 17, M: 8 | NR              | MSCT                    | No                    | VISU system                                      | LFI, BSSO, LFI+Ch, BSSO+Ch, BIMAX, TRIMAX | Error < 2mm in 80% (20 of 25) of the patients                                                                                                                                                                    |
| 2010, Bianchi      | NR           | 10          | 24                 | F: 4, M: 6  | NR              | CBCT                    | No                    | SurgiCase CMF Pro v.1.2                          | BIMAX/ TRIMAX                             | ME: 0.94 mm; error < 2 mm in 86.8% of the simulations; 90th percentile: 2.24mm, 95th percentile: 2.81 mm.                                                                                                        |
| 2010, Ulusoy       | NR           | 6           | 24 ± 6.1           | F: 2, M: 5* | *               | MSCT**                  | No                    | Dynamic volume spline                            | BIMAX *                                   | ME: 1.8 mm                                                                                                                                                                                                       |
| 2011, Centenero    | PS           | 16          | NR                 | NR          | C II, C III, As | MSCT/ CBCT              | No                    | SimPlant ProOMS v.10.1                           | BIMAX, TRIMAX, BSSO+Ch                    | 5 of 8 ST measurements: high degree of correlation, 3 measurements: medium degree of correlation                                                                                                                 |

|                         |    |     |               |                 |                                                        |                     |                  |                                                                                                  |                                                      |                                                                                                                                                                                                                                                                                                                                                                                                      |
|-------------------------|----|-----|---------------|-----------------|--------------------------------------------------------|---------------------|------------------|--------------------------------------------------------------------------------------------------|------------------------------------------------------|------------------------------------------------------------------------------------------------------------------------------------------------------------------------------------------------------------------------------------------------------------------------------------------------------------------------------------------------------------------------------------------------------|
| 2011,<br>Marchetti      | NR | 10  | NR            | F: 5,<br>M: 5   | MH and<br>mandibular<br>prognathism                    | MSCT                | No               | SurgiCase CMF<br>Pro v.1.2                                                                       | BIMAX, TRI-<br>MAX                                   | ME: 0.75 +/- 0.78 mm; error < 2 mm in 91% of the<br>simulations; 90th percentile: 1.94 mm, 95th per-<br>centile: 2.47 mm                                                                                                                                                                                                                                                                             |
| 2013,<br>Schendel       | NR | 23  | 31            | F: 13,<br>M: 10 | Maxillary,<br>mandibular<br>retrusion, mi-<br>crogenia | CBCT                | Yes <sup>c</sup> | 3dMDVultus -<br>MSM                                                                              | LFI, BSSO, Ch                                        | Entire face ME: 0.27 mm, ComR: 1.10mm, ComL<br>0.99mm, Pog 0.79mm                                                                                                                                                                                                                                                                                                                                    |
| 2013,<br>Shafi          | RS | 13  | 23 ± 8        | F: 8,<br>M: 5   | C III                                                  | CBCT                | No               | Maxilim v.2.2.0 -<br>MTM                                                                         | LFI                                                  | ME: 0.97 mm; all anatomical regions with error<br>significantly < 3.0 mm, exception UL error: 2.73<br>+/- 1.72; overprediction of UL                                                                                                                                                                                                                                                                 |
| 2013,<br>Nadjmi         | NR | 13  | NR            | F: 11,<br>M: 2  | NR                                                     | CBCT**,<br>lat ceph | Yes**            | (1)2D Dolphin<br>v.10 - fixed hard-<br>tissue to soft-tis-<br>sue ratios;<br>(2)Maxilim -<br>MTM | LFI, LFI+Ch, BI-<br>MAX, TRIMAX                      | Dolphin range of error in horizontal position: -<br>1.41 to 1.20 mm, in vertical position: -1.85 to 1.55<br>mm; Maxilim range of error in horizontal posi-<br>tion: -1.60 to 1.50 mm, in vertical position: -4.25<br>to 2.42 mm. No statistical differences between<br>softwares, exception SA in Maxilim                                                                                            |
| 2014,<br>Terzic         | RS | 13  | 25.2          | F: 8,<br>M: 5   | NR                                                     | MSCT/<br>CBCT       | Yes <sup>c</sup> | 3dMDvultus<br>v.2.2.0.8 - MSM                                                                    | BSSO,<br>BSSO+Ch, BI-<br>MAX, TRIMAX                 | ME for the upper part +0.27 mm, the lower part<br>-0.64 mm; in the lower part error < +/-1mm<br>26.9%, > +/- 1mm 73.1%, > +/-2mm 49.5% and ><br>+/-3mm 29.8%                                                                                                                                                                                                                                         |
| 2014,<br>Nadjmi         | NR | 20  | 23 ±<br>9^^   | F: 15,<br>M: 5  | C I, C II, C<br>III, As                                | CBCT                | No               | Maxilim - MTM                                                                                    | BSSO, BIMAX,<br>TRIMAX                               | ME: 1.18 mm; 84% of errors between -2 mm and<br>+2 mm                                                                                                                                                                                                                                                                                                                                                |
| 2015, Ul-<br>lah        | RS | 13  | 23 ± 8        | F: 8,<br>M: 5   | C III                                                  | CBCT                | No               | 3dMDVultus<br>v.2.2.0 - MSM                                                                      | LFI                                                  | ME: 0.92 mm (0.3-2.4 mm); 90th percentile from<br>0.65 mm (chin) to 1.17 mm (UL). ME signifi-<br>cantly < 3 mm. The 95% CI in all regions < 2 mm                                                                                                                                                                                                                                                     |
| 2015,<br>Kham-<br>bay   | RS | 10  | NR            | NR              | NR                                                     | CBCT**              | No               | 3dMDvultus<br>v.2.2.0 - MSM                                                                      | LFI                                                  | ME for 95th percentile: 0.98 mm - 0.56 mm, for<br>90th percentile: 0.91 mm - 0.50 mm; error < 2<br>mm: 94.4% - 85.2% points. The RMS error: 2.49<br>mm- 0.94 mm. The RMS difference for all meas-<br>urements: 1.3 mm                                                                                                                                                                                |
| 2015,<br>Nam            | RS | 29  | NR            | F: 13,<br>M: 16 | NR                                                     | MSCT                | No               | Simplant Pro                                                                                     | BIMAX, TRI-<br>MAX                                   | ME in all landmarks: 2.03mm. Error < 2mm:<br>52.8%. Absolute error values in the x-axis:<br>0.73mm, y-axis: 1.39mm, z-axis 0.85mm; error<br>significantly > 2 mm: ChR, ChL, LL, Pog. MaxE:<br>2.38mm in ChL, MinE: 0.84mm in pronasale.                                                                                                                                                              |
| 2015a,<br>Liebregts     | RS | 60  | 26            | F: 45,<br>M: 15 | NR                                                     | CBCT                | No               | Maxilim - MTM                                                                                    | BIMAX                                                | Landmarks: MaxE at LI 3.1 +/- 1.4 mm, MinE at<br>SN 1.5 +/- 0.6 mm. Surfaces: entire face ME: 0.81<br>+/- 0.22 mm, for UL: 1.2 +/- 0.6 mm, LL: 1.4 +/-<br>0.5 mm, chin: 1.1 +/- 0.6 mm; Error equal or < 1<br>mm: 83.3%, < 2 mm: 100%. ME among patients<br>who had a V-Y closure significantly smaller than<br>those without a V-Y closure.                                                         |
| 2015b,<br>Liebregts     | RS | 100 | 31.6^^        | F: 65,<br>M: 35 | C II                                                   | CBCT                | No               | Maxilim v.2.2.2.1<br>- MTM                                                                       | BSSO                                                 | Landmarks: ME at SN 1.1 +/- 0.5 mm, at LS 1.5<br>+/- 0.7 mm, at LI 2.0 +/- 1.0 mm, at sublabiale 1.7<br>+/- 1.1 mm, at Pog 1.5 +/- 0.9 mm. Surface: entire<br>face ME: 0.9 +/- 0.3 mm; error equal or < 2 mm:<br>100%, < 1 mm: 78%. ME for UL 0.9+/-0.5, LL<br>1.2+/-0.5, and chin 0.8 +/- 0.5mm. Average abso-<br>lute error less or equal to 2 mm for UL: 98%, for<br>LL 94%, and for the chin 97% |
| 2015,<br>Van<br>Hemelen | PS | 31  | *             | *               | C II, C III                                            | CBCT                | No               | Maxilim - MTM                                                                                    | BSSO,<br>BSSO+Ch, LFI,<br>LFI+Ch, BI-<br>MAX, TRIMAX | ME in the horizontal direction: 1.48 mm, in the<br>vertical direction: 1.46 mm                                                                                                                                                                                                                                                                                                                       |
| 2016,<br>Liebregts      | RS | 60  | 26            | F: 45,<br>M: 15 | NR                                                     | CBCT                | No               | Maxilim - MTM                                                                                    | BIMAX                                                | ME: 1.0 +/-0.9 mm in alar width                                                                                                                                                                                                                                                                                                                                                                      |
| 2016,<br>Resnick        | RS | 7   | 18.1 ±<br>1.0 | F: 5,<br>M: 2   | MH                                                     | CBCT                | Yes <sup>c</sup> | Dolphin 3D<br>v.11.8 - sparse<br>landmark-based<br>algorithm                                     | LFI                                                  | ME: 2.91 +/- 2.16 mm, for midline points: 1.66 +/-<br>1.82 mm, for lateral points: 3.84 +/- 1.92 mm. 2<br>(33%) midline points with error > 2 mm (SN,<br>SA), 6 (75%) lateral points > 2 mm. ME at NLA:<br>8.1 +/- 5.6 degrees                                                                                                                                                                       |

|                 |    |    |                 |              |                             |                 |                    |                                                                                                      |                                   |                                                                                                                                                                                                                                                                                                                                                                                                                      |
|-----------------|----|----|-----------------|--------------|-----------------------------|-----------------|--------------------|------------------------------------------------------------------------------------------------------|-----------------------------------|----------------------------------------------------------------------------------------------------------------------------------------------------------------------------------------------------------------------------------------------------------------------------------------------------------------------------------------------------------------------------------------------------------------------|
| 2017, Kim       | RS | 40 | 22.5 ± 3.2      | F: 22, M: 18 | C I, C II, C III            | MSCT**          | Yes <sup>c</sup>   | FEM with the mucosa sliding effect                                                                   | BIMAX, TRI-MAX                    | Quantitative: entire face ME 1.1 +/- 0.3mm, UL 1.2 +/- 0.7 mm, LL 1.5 +/- 0.7 mm, chin 1.3 +/- 0.7. Qualitative: 80% (32/40) clinically acceptable                                                                                                                                                                                                                                                                   |
| 2021, Kim       | RS | 35 | 23.0 ± 4.0      | F: 17, M: 18 | C I, C II, C III            | MSCT**          | Yes <sup>c</sup>   | FEM with the sliding effect of the lip and the mucosa                                                | BSSO, BIMAX, TRIMAX               | Quantitative: entire face ME 1.03 +/- 0.30 mm, UL 0.86 +/- 0.36 mm, LL 1.10 +/- 0.41 mm, chin 1.08 +/- 0.51mm. Qualitative: improvement in lips compared with previous FEM methods                                                                                                                                                                                                                                   |
| 2017, Mundluru  | RS | 13 | NR              | NR           | As                          | CBCT            | No                 | Maxilim - MTM                                                                                        | BIMAX, BSSO, BSSO+Ch              | Underprediction of ST changes. The signed ME from -0.55 to 0.43 mm; The absolute ME from 0.6 to 1.3 mm                                                                                                                                                                                                                                                                                                               |
| 2018, Holzinger | PS | 16 | 26              | F: 8, M: 8   | OB: C II, C III             | MSCT            | No                 | SOTIRIOS                                                                                             | NR - surgery first                | ME: 1.46 +/- 1.53 mm; 50% < 1.03 mm, 80% < 2.20 mm, and 95% up to 4.34 mm                                                                                                                                                                                                                                                                                                                                            |
| 2019, Knoop     | RS | 7  | 18 ± 1          | F: 5, M: 2   | MH                          | CBCT            | No                 | (1)Dolphin 3D v.11.95 - sparse landmark-based algorithm;<br>(2)ProPlan CMF v.3.0.1 - FDM;<br>(3)PFEM | LFI                               | RMSDolphin = 1.8 +/-0.8 mm, RMSPro-Plan = 1.2+/-0.4 mm, and RMSPFEM = 1.3+/-0.4 mm; average percentage of points <2 mm: PDolphin = 83+/-12%, PProPlan = 91+/-9%, and PPFEM = 88+/-10%. Better results for ProPlan and PFEM compared to Dolphin                                                                                                                                                                       |
| 2019, Elshebiny | RS | 20 | 22.7 ± 2.1      | F: 11, M: 9  | NR                          | CBCT            | No                 | Dolphin 3D v.11.9 - sparse landmark-based algorithm                                                  | BIMAX/TRI-MAX                     | Statistically significant differences in 2 angular measurements (FNA, NLA) and in 3 linear measurements (SA, UL length and subalar width)                                                                                                                                                                                                                                                                            |
| 2021, Cunha     | RS | 16 | 36              | F: 11, M: 5  | C II                        | MSCT**          | No                 | Ortho-<br>gOnBlender-<br>OOB - MSM                                                                   | BIMAX/TRI-MAX                     | ME for all landmarks < 2 mm, entire face ME: 1.07mm . MaxE: ChR, ChL, and SB                                                                                                                                                                                                                                                                                                                                         |
| 2021, Willinger | NR | 19 | 22              | F: 5, M: 14  | midfacial deficiency, C III | MSCT/<br>CBCT** | No                 | (1)IPS Case Designer - MTM;<br>(2)Dolphin 3D v.11.95 - sparse landmark-based algorithm               | modified IQLFIIIO +/- BSSO        | IR level: Dolphin ME 2.90 +/- 2.1mm, IPS ME 1.70 +/- 1.3mm; SF level: Dolphin ME: 3.57 +/- 2.0mm, IPS ME: 1.34 +/- 0.9mm; LI level: Dolphin ME 2.48 +/- 1.9mm, IPS ME 2.25 +/- 1.6mm. MaxE for Dolphin at SF level                                                                                                                                                                                                   |
| 2021, Tanikawa  | RS | 72 | 23.5            | NR           | C III                       | No – lat ceph   | Yes                | Geometric morphometric methods (GMM), DL                                                             | BIMAX                             | The system error 0.89 ± 0.30 mm. MaxE of 0.8–1.2 mm in the nasal ala, chin, corner of the mouth; the total success rate at < 1 mm: 54%; and at < 2 mm: 100%                                                                                                                                                                                                                                                          |
| 2021, ter Horst | RS | 14 | 34.2 ± 13.0     | F: 11, M: 3  | C II                        | CBCT            | Yes <sup>c</sup>   | DL; IPS CaseDesigner - MTM                                                                           | BSSO                              | <u>DL-based</u> : The lower face ME: 1.0 +/- 0.6 mm, simulations with MaxE of 1 mm: 64.3% and of 2 mm: 92.9%. RMS 1.2 +/- 0.6 mm; ME for LL 1.1 +/- 0.9 mm; for the chin 1.4 +/- 0.9 mm. <u>MTM-based</u> : The lower face ME: 1.5 +/- 0.5 mm, simulations with MaxE of 1 mm: 21.4% and of 2 mm: 85.7%. RMS 2.0 +/- 0.7 mm; ME for LL 1.7 +/- 0.9 mm; for the chin 2.0 +/- 1.0 mm. The DL model with higher accuracy |
| 2021, Alcañiz   | RS | 10 | 32              | F: 8, M: 2   | C II, C III, As, OB         | CBCT**          | Yes**              | FEM                                                                                                  | LFI, LFII, BSSO, USSO, Ch, BI-MAX | Surface with error < 3mm with coarse meshes: 92%, with fine meshes: 95%                                                                                                                                                                                                                                                                                                                                              |
| 2022, Lee       | RS | 10 | NR              | NR           | C III                       | CBCT**          | Yes** <sup>c</sup> | ProPlan CMF - FDM                                                                                    | BIMAX                             | Entire face ME: 0.73 +/- 0.21mm, for LL: 1.42 +/- 0.77mm, for UL: 1.14 +/-0.80mm, for chin: 0.95 +/-0.58mm; error < 2mm: 90.9%                                                                                                                                                                                                                                                                                       |
| 2022, Gutiérrez | RS | 10 | 32              | F: 8, M: 2   | C II, C III, As, OB         | CBCT**          | Yes**              | FEM                                                                                                  | LFI, LFII, BSSO, USSO, Ch, BI-MAX | All distances for both meshes and their mean distances significantly < 2 mm, except LL, RGo and LGo. Distances for all landmarks significantly < 3 mm, except for LL of the fine mesh                                                                                                                                                                                                                                |
| 2022, Yamashita | RS | 88 | NR <sup>^</sup> | F: 62, M: 26 | C II, C III                 | CBCT            | No                 | Dolphin 3D v.11.95 - sparse landmark-based algorithm                                                 | BIMAX, TRI-MAX                    | C II: underprediction with downward direction in S-Y, S-Z, LI-Y, SB-Y, Pog-Y, Pog-Z, Gn-Y, Gn-Z, Me-Y, Me-Z, values > 2 mm: LI-Y, SB-Y, Pog-Y, Gn-Y, Gn-Z, Me-Y. MaxE LI-Y: 2.73 mm. C III: overprediction and downward direction in Pog-Z, Gn-Y, Gn-Z, Me-Y, and Me-Z, all discrepancies < 2 mm.                                                                                                                    |

|                        |    |    |                 |                 |             |               |                  |                                                                           |       |                                                                                                                                                                                                                                                                                                                  |
|------------------------|----|----|-----------------|-----------------|-------------|---------------|------------------|---------------------------------------------------------------------------|-------|------------------------------------------------------------------------------------------------------------------------------------------------------------------------------------------------------------------------------------------------------------------------------------------------------------------|
| 2022, Ma               | NR | 40 | NR <sup>a</sup> | F: 24,<br>M: 16 | NR          | MSCT**        | No               | FSC-Net, point<br>cloud DL                                                | NR    | Qualitative: FSC-Net comparable with FEM-<br>RLSE. Quantitative: landmarks entire face ME<br>2.95 +/-0.61mm; surface entire face ME: 1.55 +/-<br>0.30mm, lips 1.58 +/- 0.26mm, chin: 2.11 +/-<br>0.77mm; FSC-Net comparable with FEM-RLSE                                                                        |
| 2022,<br>Awad          | NR | 20 | 27.3            | F:10,<br>M:10   | C II, C III | CBCT          | Yes              | IPS<br>CaseDesigner<br>v.2.1.4.4 - MTM                                    | BIMAX | Entire face ME: -1.5 to 1.4 mm, UL -2.5 to 1.3<br>mm, LL -2.1 to 2.5 mm, chin -1.8 to 2.6 mm                                                                                                                                                                                                                     |
| 2022,<br>Hou           | RS | 58 | 26.7            | F: 37,<br>M: 21 | C III       | CBCT          | Yes <sup>c</sup> | ProPlan CMF -<br>FDM                                                      | BIMAX | Entire face ME: 1.43 +/- 0.40 mm. Error of UL,<br>LL, chin, right external buccal and left external<br>buccal > 2.0 mm; LL the least predictable: 2.69 ±<br>1.25 mm                                                                                                                                              |
| 2023,<br>Şenyü-<br>rek | RS | 16 | 18.5 ±<br>2.13  | NR              | MH          | CBCT**        | No               | ProPlan CMF<br>v.3.0 - FDM                                                | LFI   | Error in UL and LL: 1.49 +/- 0.77 mm, in cheeks:<br>0.98 +/- 0.34 mm, nose: 0.86 +/- 0.23 mm, and<br>eyes: 0.76 +/- 0.32 mm                                                                                                                                                                                      |
| 2023,<br>Ruggiero      | PS | 5  | NR              | NR              | NR          | CBCT +<br>MRI | No               | FEM with pa-<br>tient-specific<br>model generated<br>from CBCT and<br>MRI | BIMAX | Midface ME: 0.55 +/- 2.29 mm                                                                                                                                                                                                                                                                                     |
| 2024,<br>Fang          | RS | 40 | NR              | NR              | NR          | MSCT**        | No               | DL, ACMT-Net<br>with the CPISA<br>module                                  | BIMAX | Quantitative: Surface entire face ME 1.06 +/-<br>0.43 mm, UL 1.13 +/- 0.71 mm, LL 1.23 +/- 0.48<br>mm, chin 1.13 +/- 0.62mm; landmarks entire face<br>ME 2.44 +/- 0.45 mm, upper face 1.23 +/- 0.47<br>mm, lower face 3.25 +/- 0.66 mm<br>Qualitative: 77.5% (31/40) of the simulations<br>clinically acceptable |

<sup>a</sup> only range was reported; <sup>^^</sup> growing patients also included in the study group < 14yo; \*not clear; \*\* device not specified; <sup>a</sup> details in the appendix D; <sup>b</sup> most relevant results; <sup>c</sup> 3D photograph fused with the MSCT/CBCT skin surface; As, asymmetry; BIMAX, bimaxillary osteotomy; BSSO, bilateral mandibular sagittal split osteotomy; Ch, genioplasty; ChL, cheilion left; ChR, cheilion right; C, Class; ComL, left commissure; ComR, right commissure; DL, deep learning; F, female; FDM, finite difference method; FEM, finite element model; FNA, frontonasal angle; Gn, soft tissue gnathion; IR, infraorbital rim; IQLFIIO, intraoral quadrangular Le Fort II osteotomy; lat cephalograms; LFI, Le Fort I maxillary osteotomy; LGo, soft tissue left gonion; Li, crown of the lateral incisor; LI, labrale inferior; LL, lower Lip; LS, labrale superior; M, male; MaxE, maximal error; Me, soft tissue menton; ME, mean error; MH, maxillary hypoplasia; MinE, minimal error; MSM, mass spring model; MTM, mass tensor model; NLA, nasolabial angle; NR, not reported; OB, open bite; PFEM, probabilistic FEM; Pog, soft tissue pogonion; PS, prospective study; RGo, soft tissue right gonion; RMS, root mean square distance; RS, retrospective study; S, stomion; SA, soft tissue A point; SB, soft tissue B point; SF, sinus floor; SN, subnasale; ST, soft tissue; TRIMAX, bimaxillary osteotomy and genioplasty; UL, upper Lip; USSO, unilateral mandibular sagittal split osteotomy. C I, correct relationship between the maxilla and the mandible. C II, retrusive mandible in relation to the maxilla; C III, protrusive mandible in relation to the maxilla.

**Table S3.** The revised Quadas2 tool for risk of bias and applicability assessment.

| Study           | Risk of Bias                                                                        |                                                                                     |                                                                                     |                                                                                     | Applicability                                                                         |                                                                                       |                                                                                       |
|-----------------|-------------------------------------------------------------------------------------|-------------------------------------------------------------------------------------|-------------------------------------------------------------------------------------|-------------------------------------------------------------------------------------|---------------------------------------------------------------------------------------|---------------------------------------------------------------------------------------|---------------------------------------------------------------------------------------|
|                 | Patient selec-<br>tion                                                              | Index Test                                                                          | Reference<br>Standard                                                               | Flow and Tim-<br>ing                                                                | Patient selection                                                                     | Index Test                                                                            | Reference Stand-<br>ard                                                               |
| 2004, Chabanas  |  |  |  |  |  |  |  |
| 2007, Mollemans |  |  |  |  |  |  |  |
| 2007, Marchetti |  |  |  |  |  |  |  |
| 2010, Bianchi   |  |  |  |  |  |  |  |
| 2010, Ulusoy    |  |  |  |  |  |  |  |
| 2011, Centenero |  |  |  |  |  |  |  |
| 2011, Marchetti |  |  |  |  |  |  |  |
| 2013, Schendel  |  |  |  |  |  |  |  |

|                                            |   |   |   |   |   |   |   |
|--------------------------------------------|---|---|---|---|---|---|---|
| 2013, Shafi                                | 😊 | 😊 | 😊 | 😊 | 😞 | 😊 | 😊 |
| 2013, Nadjmi                               | 😊 | 😞 | 😊 | 😞 | 😊 | 😞 | 😊 |
| 2014, Terzic                               | 😊 | 😞 | 😊 | 😞 | 😐 | 😞 | 😊 |
| 2014, Nadjmi                               | 😊 | 😊 | 😊 | 😞 | 😞 | 😞 | 😊 |
| 2015, Ullah                                | 😊 | 😊 | 😊 | 😊 | 😞 | 😊 | 😊 |
| 2015, Khambay                              | 😐 | 😊 | 😊 | 😐 | 😞 | 😊 | 😊 |
| 2015, Nam                                  | 😊 | 😞 | 😊 | 😐 | 😞 | 😊 | 😊 |
| 2015a, Liebregts                           | 😊 | 😊 | 😞 | 😐 | 😞 | 😊 | 😊 |
| 2015b, Liebregts                           | 😊 | 😊 | 😞 | 😊 | 😞 | 😊 | 😊 |
| 2015, Van Hemelen                          | 😐 | 😞 | 😊 | 😞 | 😊 | 😞 | 😞 |
| 2016, Liebregts                            | 😊 | 😊 | 😞 | 😊 | 😞 | 😞 | 😊 |
| 2016, Resnick                              | 😊 | 😊 | 😞 | 😞 | 😞 | 😊 | 😊 |
| 2017, Kim                                  | 😊 | 😊 | 😊 | 😞 | 😊 | 😐 | 😊 |
| 2021, Kim                                  | 😊 | 😊 | 😊 | 😞 | 😊 | 😐 | 😊 |
| 2017, Mundluru                             | 😐 | 😊 | 😊 | 😐 | 😞 | 😊 | 😊 |
| 2018, Holzinger                            | 😊 | 😊 | 😊 | 😞 | 😐 | 😞 | 😊 |
| 2019, Knoops                               | 😊 | 😊 | 😞 | 😊 | 😞 | 😊 | 😞 |
| 2019, Elshebiny                            | 😊 | 😊 | 😊 | 😞 | 😐 | 😞 | 😊 |
| 2021, Cunha                                | 😊 | 😞 | 😊 | 😞 | 😞 | 😊 | 😊 |
| 2021, Willinger                            | 😊 | 😊 | 😊 | 😞 | 😞 | 😞 | 😊 |
| 2021, Tanikawa                             | 😊 | 😊 | 😞 | 😊 | 😞 | 😞 | 😊 |
| 2021, ter Horst                            | 😊 | 😊 | 😊 | 😞 | 😞 | 😊 | 😊 |
| 2021, Alcañiz                              | 😞 | 😊 | 😊 | 😐 | 😊 | 😞 | 😊 |
| 2022, Lee                                  | 😐 | 😊 | 😞 | 😞 | 😞 | 😊 | 😊 |
| 2022, Gutiérrez                            | 😞 | 😊 | 😊 | 😐 | 😊 | 😞 | 😊 |
| 2022, Yamashita                            | 😊 | 😞 | 😊 | 😊 | 😞 | 😞 | 😊 |
| 2022, Ma                                   | 😊 | 😞 | 😊 | 😐 | 😐 | 😊 | 😊 |
| 2022, Awad                                 | 😊 | 😞 | 😊 | 😞 | 😊 | 😊 | 😊 |
| 2022, Hou                                  | 😊 | 😊 | 😞 | 😞 | 😊 | 😊 | 😞 |
| 2023, Şenyürek                             | 😐 | 😊 | 😊 | 😐 | 😞 | 😞 | 😊 |
| 2023, Ruggiero                             | 😐 | 😊 | 😊 | 😞 | 😐 | 😞 | 😊 |
| 2024, Fang                                 | 😐 | 😊 | 😐 | 😞 | 😐 | 😐 | 😊 |
| 😊 Low risk   😐 Unclear risk   😞 High risk. |   |   |   |   |   |   |   |

**Table S4.** Image acquisition technique and device.

| Year, author    | Image acquisition                          |                                                 |
|-----------------|--------------------------------------------|-------------------------------------------------|
|                 | MSCT/CBCT device                           | 3D photograph device                            |
| 2004, Chabanas  | MSCT *                                     |                                                 |
| 2007, Mollemans | MSCT *                                     | 3D camera system (Eyetrionics, Leuven, Belgium) |
| 2007, Marchetti | MSCT - High Speed Spiral (GE,Waukesha, WI) |                                                 |

|                   |                                                                                                          |                                                        |
|-------------------|----------------------------------------------------------------------------------------------------------|--------------------------------------------------------|
| 2010, Bianchi     | CBCT - NewTom 3G (QR, Verona, Italy)                                                                     |                                                        |
| 2010, Ulusoy      | MSCT*                                                                                                    |                                                        |
| 2011, Centenero   | MSCT - General Electric HiSpeed; CBCT - IS I-CAT 17-23                                                   |                                                        |
| 2011, Marchetti   | MSCT - 16 slices Light Speed (GE, Milwaukee, WI, USA)                                                    |                                                        |
| 2013, Schendel    | CBCT - i-CAT (Imaging Sci. Int., Hatfield, PA, USA)                                                      | 3dMD (Atlanta, GA, USA)                                |
| 2013, Shafi       | CBCT - i-CAT (Imaging Sci. Int., Hatfield, PA, USA)                                                      |                                                        |
| 2013, Nadjmi      | CBCT*; CBCT synthesized lateral cephalograms                                                             | *                                                      |
| 2014, Terzic      | MSCT - Siemens Sensation 64; (Germany) / CBCT - NewTom VGi (QR, Verona, Italy)                           | 3dMDTrio System (3dMD, Atlanta, GA, USA)               |
| 2014, Nadjmi      | CBCT - i-CAT (Imaging Sci. Int., Hatfield, PA, USA)                                                      |                                                        |
| 2015, Ullah       | CBCT - i-CAT (Imaging Sci. Int., Hatfield, PA, USA)                                                      |                                                        |
| 2015, Khambay     | CBCT*                                                                                                    |                                                        |
| 2015, Nam         | MSCT - GE lightspeed VCT XT (GE, Milwaukee, WI, USA)                                                     |                                                        |
| 2015a, Liebrechts | CBCT - i-CAT (Imaging Sci. Int., Hatfield, PA, USA)                                                      |                                                        |
| 2015b, Liebrechts | CBCT - i-CAT (Imaging Sci. Int., Hatfield, PA, USA)                                                      |                                                        |
| 2015, Van Hemelen | CBCT - i-CAT (Imaging Sci. Int., Hatfield, PA, USA)                                                      |                                                        |
| 2016, Liebrechts  | CBCT - i-CAT (Imaging Sci. Int., Hatfield, PA, USA)                                                      |                                                        |
| 2016, Resnick     | CBCT: i-CAT (Imaging Sci. Int., Hatfield, PA, USA) / Planmeca Promax 3D Max (Planmeca, Roselle, IL, USA) | 3D VECTRA M3 (Canfield Scientific, Fairfield, NJ, USA) |
| 2017, Kim         | MSCT*                                                                                                    | 3dMD (Atlanta, GA, USA)                                |
| 2021, Kim         | MSCT*                                                                                                    | 3dMD (Atlanta, GA, USA)                                |
| 2017, Mundluru    | CBCT - iCAT (Imaging Sci. Int., Hatfield, PA, USA)                                                       |                                                        |
| 2018, Holzinger   | MSCT - Philips Brilliance 64 (Amsterdam, NL)                                                             |                                                        |
| 2019, Knoops      | CBCT: i-CAT (Imaging Sci. Int., Hatfield, PA, USA) / Planmeca Promax 3D Max (Planmeca, Roselle, IL, USA) |                                                        |
| 2019, Elshebiny   | CBCT CB Mercuray (Hitachi Medical Systems America, Twinsburg, OH)                                        |                                                        |
| 2021, Cunha       | MSCT*                                                                                                    |                                                        |
| 2021, Willinger   | MSCT/CBCT*                                                                                               |                                                        |
| 2021, Tanikawa    | lateral cephalograms                                                                                     | 3dMD cranial System (3dMD, Atlanta, GA, USA)           |
| 2021, ter Horst   | CBCT - i-CAT (Imaging Sci. Int., Hatfield, PA, USA)                                                      | 3dMD face System (3dMD, Atlanta, GA, USA)              |
| 2021, Alcañiz     | CBCT*                                                                                                    | *                                                      |
| 2022, Lee         | CBCT*                                                                                                    | *                                                      |
| 2022, Gutiérrez   | CBCT*                                                                                                    | *                                                      |
| 2022, Yamashita   | CBCT - i-CAT (Imaging Sci. Int., Hatfield, PA, USA)                                                      |                                                        |
| 2022, Ma          | MSCT*                                                                                                    |                                                        |
| 2022, Awad        | CBCT - KaVo 3D (KaVo Dental GmbH; Biberach an der Riß, Germany)                                          | 3dMDTrio System (3dMD; Brentford, London, UK)          |
| 2022, Hou         | CBCT - NewTom (NewTom AG, Marburg, Germany)                                                              | 3dMDTrio System (3dMD, Atlanta, GA, USA)               |
| 2023, Şenyürek    | CBCT *                                                                                                   |                                                        |
| 2023, Ruggiero    | CBCT - NewTom 3000 VGI Evo (Cefla Group, Imola, Italy), MRI – GE 1.5 T                                   |                                                        |
| 2024, Fang        | MSCT*                                                                                                    |                                                        |

\* device not specified.
